## Increased Insular Functional Connectivity During Repetitive Negative Thinking in Major Depression and Healthy Volunteers

Landon S Edwards<sup>a</sup>, Saampras Ganesan<sup>b,c</sup>, Jolene Tay<sup>a</sup>, Eli S Elliott<sup>a</sup>, Masaya Misaki<sup>a,d</sup>, Evan J White<sup>a,d</sup>, Martin P Paulus<sup>a,d</sup>, Salvador M Guinjoan<sup>a,e,f</sup>, Aki Tsuchiyagaito<sup>a,d,g</sup>

<sup>a</sup> Laureate Institute for Brain Research, Tulsa, OK, USA

<sup>b</sup> Department of Biomedical Engineering, The University of Melbourne, Carlton, Victoria 3053, Australia

<sup>c</sup> Contemplative Studies Centre, Melbourne School of Psychological Sciences, The University of Melbourne, Melbourne, Victoria 3010, Australia

<sup>d</sup> Oxley College of Health and Natural Sciences, The University of Tulsa, Tulsa, OK, USA

<sup>e</sup> Department of Psychiatry, Oklahoma University Health Sciences Center at Tulsa, Tulsa, OK, USA

<sup>f</sup> Laureate Psychiatric Hospital and Clinic, Tulsa, OK, USA

<sup>g</sup> Research Center for Child Mental Development, Chiba University, Chiba, Japan

### # Corresponding Author:

Aki Tsuchiyagaito

Laureate Institute for Brain Research

6655 South Yale Ave. Tulsa, OK 74136, USA

Tel: 918-502-5112

E-mail: [atsuchiyagaito@laureateinstitute.org](mailto:atsuchiyagaito@laureateinstitute.org)

**Number of Tables:** 3

**Number of Figures:** 2

**Word count:** 4430

## Abstract

**Background:** Repetitive negative thinking (RNT) in major depressive disorder (MDD) involves persistent focus on negative self-related experiences. Resting-state fMRI shows that the functional connectivity (FC) between the insula and the superior temporal sulcus is critical to RNT intensity. This study examines how insular FC patterns differ between resting-state and RNT-induction in MDD and healthy participants (HC).

**Methods:** Forty-one individuals with MDD and twenty-eight HCs (total n=69) underwent resting-state and RNT-induction fMRI scans. Seed-to-whole brain analysis using insular subregions as seeds was performed.

**Results:** No diagnosis-by-run interaction effects were observed across insular subregions. MDD participants showed greater FC between bilateral anterior, middle, and posterior insular regions and the cerebellum ( $z = 4.31$  to  $6.15$ ). During RNT-induction, both MDD and HC participants demonstrated increased FC between bilateral anterior and middle insula and key brain regions, including prefrontal cortices, parietal lobes, posterior cingulate cortex, and medial temporal gyrus, encompassing the STS ( $z = 4.47$  to  $8.31$ ). Higher trait-RNT was associated with increased FC between the right dorsal anterior and middle insula and regions in the DMN and salience network in MDD participants ( $z = 4.31$  to  $6.15$ ). Greater state-RNT scores were linked to increased FC in similar insular regions, the bilateral angular gyrus and right middle temporal gyrus ( $z = 4.47$  to  $8.31$ ).

**Conclusions:** Hyperconnectivity in insula subregions during active rumination, especially involving the DMN and salience network, supports theories of heightened

self-focused and negative emotional processing in depression. These findings emphasize the neural basis of RNT when actively elicited in MDD.

**Keywords:** insula, repetitive negative thinking, rumination, depression, functional connectivity

## 1 **1. Introduction**

2 Repetitive Negative Thinking (RNT), such as rumination in the context of depression, is  
3 a cognitive process characterized by a persistent focus on negative experiences related  
4 to the self (Nolen-Hoeksema *et al.*, 2008). RNT is a symptom dimension with significant  
5 implications for the course and prognosis of depression, making this disorder refractory  
6 to treatment, chronic, and complicated with suicide (Krajniak *et al.*, 2013, Surrence *et al.*,  
7 2009, Watkins and Roberts, 2020). Previous research has examined the triggers,  
8 intensity, and duration of RNT. Characterizing the neurobiological mechanisms of RNT  
9 is important not only for understanding its formation, but also to discern targets for  
10 neuromodulation addressed at alleviating this symptom.

11 Prior functional connectivity-based (FC) studies have identified many regions of  
12 interest (ROIs) as they relate to heightened RNT and brooding symptoms in individuals,  
13 including the left dorsolateral prefrontal cortex, precuneus, and other components of the  
14 default mode network (DMN) (Jacob *et al.*, 2020, Taylor *et al.*, 2022). However, our  
15 previous resting-state fMRI study revealed that RNT intensity correlates with increased  
16 FC between the bilateral anterior insular cortices and the right superior temporal sulcus  
17 (STS) (Tsuchiyagaito *et al.*, 2022). This result highlighted the neural mechanisms  
18 underlying RNT as difficulties in disengaging attention from negative emotional  
19 responses (Craig, 2009), and having interrelation with inner-speech processing (Deen  
20 *et al.*, 2015). This is compatible with the view that the DMN serves resting self-dialogue,  
21 but not necessarily depressive rumination (Goldstein-Piekarski *et al.*, 2022). Thus, prior  
22 evidence deemphasizes the role of DMN dysfunction in RNT (Goldstein-Piekarski *et al.*,  
23 2022, Makovac *et al.*, 2020, Tozzi *et al.*, 2021), while recent work by our group

24 (Tsuchiyagaito *et al.*, 2022) demonstrates that the functional connection between the  
25 insula (Craig, 2009) and the STS (Deen *et al.*, 2015) is related to the intensity of RNT  
26 (Tsuchiyagaito *et al.*, 2022). Nevertheless, our understanding is limited to the resting-  
27 state data, which lacks clarity on the RNT circuit when individuals are actively engaging  
28 with RNT.

29 RNT has been established as a trait-like cognitive process which involves recurrent  
30 and continuous focus on self-relevant negative thoughts that is persistent over time and  
31 across situations. However, RNT intensity can also fluctuate, such that there is a state  
32 component to it; it can be influenced by overall depression symptom severity, instant  
33 mood state, and adverse environmental stimuli - including relevant interpersonal  
34 interactions (Chang *et al.*, 2023, Philippi *et al.*, 2022). This differentiation aligns with  
35 recent studies utilizing the experimental induction of RNT, which demonstrates the  
36 potential independence and distinct characteristics of both trait- and state-RNT (Grant *et*  
37 *al.*, 2021, LeMoult *et al.*, 2013, Robinson and Alloy, 2003, Wang *et al.*, 2022). For  
38 example, Misaki *et al.* (2023) highlighted that while RSFC alterations distinguish  
39 between healthy and depressed individuals, trait-RNT in depressed individuals is more  
40 closely predicted by functional connectivity during an induced RNT scan rather than  
41 resting-state scan, suggesting that RNT involves an active mental process not fully  
42 represented in the resting-state. While trait-RNT measures an individual's tendency to  
43 engage in RNT, induced RNT (capturing instant symptomatology) enables us to probe  
44 for specific triggers, response patterns, and the phenomenological characteristics of  
45 RNT that are not captured by trait-RNT alone. Thus, discerning the brain mechanisms

46 that underlie both the trait and state aspects of RNT could have significant implications  
47 for clinical practice in terms of RNT remediation.

48 Given the results of our previous resting-state FC investigations and the prior  
49 literature, we aimed to further clarify the mechanistic basis of RNT by comparing insular  
50 FC during RNT-induction with resting-state FC in individuals with MDD. Specifically, we  
51 employed a seed-to-whole-brain analysis using six insula subregions as seeds. We  
52 hypothesized that individuals with MDD would exhibit a more substantial increase in  
53 insular FC during RNT-induction compared to resting-state, with these alterations being  
54 more pronounced in the MDD individuals than in HC. By investigating these neural  
55 dynamics, we seek to address the question: how do the functional connectivity patterns  
56 of the insula differ between resting-state and RNT-induction in MDD, and what  
57 implications do these differences have for the development of targeted neuromodulatory  
58 interventions?

59

## 60 **2. Methods**

### 61 **2.1 Study Design**

62 The study protocol was reviewed and approved by the WCG IRB  
63 (<https://www.wcgirb.com>) (IRB Tracking Number 20210286), and registered on  
64 ClinicalTrials.gov (NCT04941066) as a part of a real-time fMRI-neurofeedback (rtfMRI-  
65 nf) study (Tsuchiyagaito *et al.*, 2023b, Tsuchiyagaito *et al.*, 2021).

66

### 67 **2.2 Participants**

68 Forty-one MDD and twenty-eight healthy control (HC) volunteers were recruited for  
69 rtfMRI-nf studies, making up a total of sixty-nine participants (Tsuchiyagaito *et al.*, 2023b,  
70 Tsuchiyagaito *et al.*, 2021). Participants were of both sexes, between the ages of 18 and  
71 65 years old, and fluent in English. Exclusion criteria were pregnancy, an abnormal  
72 neuromorphological brain profile as assessed by a radiology specialist physician, and  
73 other general contraindications for MRI safety. HC participants were defined based on  
74 the Mini-International Neuropsychiatric Interview 7.0.2 (MINI) (Sheehan *et al.*, 1998),  
75 and confirmed in a clinical conference with a board-certified psychiatrist. MDD-specific  
76 inclusion criteria included: meeting the criteria of the 5th edition of the *Diagnostic and*  
77 *Statistical Manual of Mental Disorders* (DSM-5) for unipolar MDD based on the MINI  
78 (Sheehan *et al.*, 1998) and current depressive symptoms with a Montgomery-Åsberg  
79 Depression Rating Scale (MADRS) score of > 6 (Montgomery and Asberg, 1979). MDD-  
80 specific exclusion criteria were as follows: a lifetime history of bipolar disorder,  
81 schizophrenia, or any psychotic disorders; DSM-5 criteria for substance abuse or  
82 dependence within six months prior to study entry; active suicidal ideation as indicated  
83 by the Columbia-Suicide Severity Rating Scale (C-SSRS) (Posner *et al.*, 2011) or an  
84 attempt within 12 months prior to study entry; commencement of psychotropic  
85 medication for depression and/or anxiety less than one month before the study  
86 enrollment; commencement of psychological therapy less than one month before the  
87 study enrollment. All participants completed a written, informed consent process before  
88 participating in the study.

89

### 90 **2.3 Neuroimaging data acquisition**

91 Neuroimaging was conducted on a 3 Tesla MR750 Discovery scanner (GE Healthcare,  
92 Milwaukee, WI) with an 8-channel, receive-only head array coil. Blood-oxygen-level-  
93 dependent fMRI data were acquired using a T2\*-weighted gradient echo-planar  
94 sequence with sensitivity encoding (GE-EPI SENSE) with the following parameters:  
95 TR/TE = 2000/25 ms, acquisition matrix = 96 × 96, FOV/slice = 240/2.9 mm, flip angle =  
96 90°, voxel size = 2.5×2.5×2.9 mm; 40 axial slices, SENSE acceleration R = 2. To  
97 provide anatomical reference for fMRI data, T1-weighted (T1w) MRI images were  
98 acquired with a magnetization-prepared rapid gradient-echo (MPRAGE) sequence with  
99 the parameters of FOV = 240×192 mm, matrix = 256×256, 124 axial slices, slice  
100 thickness = 1.2 mm, 0.94×0.94×1.2 mm<sup>3</sup> voxel volume, TR/TE = 5/2 ms, SENSE  
101 acceleration R = 2, flip angle = 8°, delay/inversion time TD/TI = 1400/725 ms, sampling  
102 bandwidth = 31.2 kHz, scan time = 4 min 59 s.

103

#### 104 **2.4 Experimentally induced RNT and resting-state scanning**

105 The MRI session started with a 5 min T1w MRI anatomical scan, 6 min 50 s resting-  
106 state fMRI scan, and a 6 min 50 s experimentally induced RNT fMRI scan. Prior to the  
107 MRI session, participants identified a recent personal event that significantly triggered  
108 RNT, such as experiencing rejection by someone important to them. Participants  
109 provided a brief title for this event, which was used by research staff to prompt the  
110 participant's recall immediately before the RNT-inducing fMRI scan. Participants were  
111 then instructed about the neurofeedback task as described in detail in Tsuchiyagaito *et*  
112 *al.* (2023b), Tsuchiyagaito *et al.* (2021), and then had a rest period before the MRI  
113 session. In the scanner, the session began with a resting-state scan, where participants



114 were instructed to clear their mind and not think of anything while viewing a fixation  
115 cross. This was followed by the RNT-inducing fMRI scan, during which participants were  
116 reminded of their chosen event and instructed to introspectively ruminate and ponder on  
117 it. While keeping their gaze on the fixation cross, they were asked to focus on their  
118 emotional reactions to their chosen event and why they responded the way they did.  
119 This procedure aimed to engage the participants in a state of rumination and brooding,  
120 characteristic of RNT, while inside the scanner. The MRI session ended with  
121 neurofeedback scans as described elsewhere (Tsuchiyagaito *et al.*, 2023b,  
122 Tsuchiyagaito *et al.*, 2021).

123

## 124 **2.5 Symptom measures**

### 125 **Trait-RNT**

126 The 22-item Ruminative Response Scale (RRS) (Nolen-Hoeksema and Morrow, 1991)  
127 was used to measure trait-RNT. The RRS is composed of three subscales; the 5-item  
128 'brooding' subscale (e.g., RRS-B item: *think 'why can't I handle things better'*), the 12-  
129 item 'depressive rumination' subscale (e.g., RRS-D item: *think about all of your*  
130 *shortcomings, failings, faults, and mistakes*), and the 5-item 'reflection' subscale (e.g.,  
131 RRS-R item: *write down what you are thinking and analyse it*). It assesses an  
132 individual's tendency or trait to ruminate when they feel sad or are faced with  
133 depressive symptoms. Participants are asked to indicate what they "generally do when  
134 feeling down, sad, or depressed" using a 4-point Likert scale ranging from 1 (never) to 4  
135 (always), representing the trait tendency. The items in the RRS-B measure how often  
136 people engage in RNT, the causes and consequences of RNT, or a passive comparison

137 with unachieved goals – characteristics that are found to lead to worse prognoses of  
138 depression (Treyner *et al.*, 2003). The items in the RRS-D subscale are similar to the  
139 RRS-B subscale; however, this subscale measures how often people engage in RNT,  
140 with a focus on the depressive symptoms and moods. We employed the RRS-B and  
141 RRS-D subscales for connectivity analyses related to trait-RNT. The RRS-R subscale  
142 was not included in our main analysis (results are shown in the Supplementary  
143 materials 2.1) as it does not include pathological elements of RNT and may even reflect  
144 protective factors against depression (Treyner *et al.*, 2003).

145

#### 146 **State-RNT**

147 The level of state-RNT that immediately followed the state-RNT fMRI scan was  
148 assessed with the visual analogue scale (VAS). Right after the resting-state and RNT-  
149 induction scans, participants used a button box to answer the question, “*To what extent*  
150 *did you dwell on negative aspects of yourself?*”. The answers consisted of ratings from  
151 1 (not at all) to 10 (extremely), indicating the intensity of their state-RNT during the scan.

#### 152 **Severity of depression and anxiety**

153 Individuals with MDD were assessed before the MRI session using the Montgomery-  
154 Åsberg Depression Rating Scale (MADRS) (Montgomery and Asberg, 1979) and the  
155 Hamilton Anxiety Scale (HAMA) (Maier *et al.*, 1988).

156

#### 157 **2.6 Preprocessing**

158 Preprocessing of functional images was performed with Analysis of Functional  
159 NeuroImages (AFNI) (<http://afni.nimh.nih.gov/afni/>). The initial three volumes were

160 excluded from the analysis. The preprocessing included despiking, RETROICOR  
161 (Glover *et al.*, 2000), respiratory volume per time (Birn *et al.*, 2008) physiological noise  
162 corrections, slice-timing correction, motion corrections, nonlinear warping to the MNI  
163 template brain with resampling to 2 mm<sup>3</sup> voxels using the Advanced Normalization Tools  
164 (Avants *et al.*, 2008) (<http://stnava.github.io/ANTs/>), smoothing with 6mm-FWHM kernel,  
165 and scaling to percent change relative to the mean signal in each voxel. We used  
166 FastSurfer (<https://www.sciencedirect.com/science/article/pii/S1053811920304985>) to  
167 extract white matter and ventricle masks from the anatomical image of an individual  
168 subject and then warped them to the normalized fMRI image space. General linear  
169 model (GLM) analysis was performed with regressors of 12 motion parameters (three  
170 rotations, three shifts, and their temporal derivatives), three principal components of  
171 ventricle signals, local white matter average signals (ANATICOR (Jo *et al.*, 2010)), 4th-  
172 order Legendre polynomials for high-pass filtering, and censoring TRs with large head  
173 motion (> 0.25 mm frame-wise displacement). Any data with more than 30% censored  
174 volumes was treated as a missing value for the group-level analysis (two datasets of HC  
175 during RNT-induction, and two datasets of MDD participants during RNT-induction and  
176 resting-state scans were treated as missing values). Voxel-wise residual signals of the  
177 GLM were used for the seed-to-whole brain analysis.

178

## 179 **2.7 Seed-to-whole brain analysis**

### 180 **Definition of insular subregions**

181 In order to better delineate the specific function of the insula, the Brainnetome insula  
182 sub-regions parcellation atlas was used (Fan *et al.*, 2016). This parcellation atlas

183 defined fine-grained insular subregions using probabilistic connectivity patterns. The  
184 insula was segmented into six subregions in each hemisphere, including the  
185 hypergranular insula (G), ventral agranular insula (vla), dorsal agranular insula (dla)  
186 (Sliz and Hayley, 2012), ventral dysgranular and granular insula (vld/vlg), dorsal  
187 granular insula (dlg), and dorsal dysgranular insula (dld) (Supplementary materials,  
188 Figure S1).

189

### 190 **FC processing**

191 Twelve seed-to-whole brain FC maps were calculated based on predefined insular  
192 subregions. The average time-course was obtained from the seeds, and the FC maps  
193 were generated by calculating Pearson's correlation coefficients between the time  
194 series within the seed and the time series from every other voxel across the whole brain.  
195 Correlation coefficients were converted to z-scores using Fisher's r-to-z transformation.

196

### 197 **Statistical analysis**

198 AFNI's 3dLMER was performed on each seed to identify the connectivity patterns of the  
199 insular subregions with the interaction of diagnosis (MDD vs. HC) by run (RNT-induction  
200 vs. Rest), age, sex, motion, and medication status as fixed effects, and subjects as  
201 random intercepts. Results of the main interaction effect, main effect of diagnosis, and  
202 main effect of run were reported as a chi-square statistic, and post-hoc general linear t-  
203 style tests (GLT) were specified in case of the significant main effect, as per the output  
204 of AFNI's 3dLMER. The significant threshold was set as peak  $p < 0.001$  and cluster-wise  
205  $p < 0.05/12$  (Bonferroni-corrected). AFNI's 3dClustSim with 10,000 permutation tests

206 were employed to define the cluster-size thresholds ( $k > 143$  voxels). Furthermore,  
 207 linear correlation analyses were performed to investigate the association between  
 208 changes in FC values during RNT-induction scans compared to resting-state scans, and  
 209 the trait- and  $\Delta$ state-RNT (changes in RNT-induction relative to the baseline resting-  
 210 state) in the MDD and HC groups, respectively. The uncorrected threshold  $p < 0.05$  was  
 211 considered significant for this exploratory correlation analysis.

212

### 213 3. Results

#### 214 3.1 Demographic and clinical measures

215 Table 1 shows the demographic data and clinical characteristics of the MDD ( $n=41$ ) and  
 216 HC ( $n=28$ ) participants (total  $n=69$ ). The majority of these participants were Female and  
 217 White, and over half of the MDD participants experienced anxiety disorder  
 218 comorbidities (51.2%) and were treated with antidepressants (51.2%) (Table 1).

**Table 1.** Demographic data

| Demographic data                                       | MDD         |         | HC          |         |
|--------------------------------------------------------|-------------|---------|-------------|---------|
|                                                        | Mean/Number | SD/%    | Mean/Number | SD/%    |
| Age                                                    | 36.54       | (12.27) | 23.04       | (3.92)  |
| Female (%)                                             | 31          | (75.61) | 21          | (75)    |
| Handedness: Right (%)                                  | 37          | (90.24) | 28          | (100)   |
| Race/Ethnicity: Non-white (%)                          | 8           | (19.51) | 13          | (46.43) |
| Asian                                                  | 0           | (0)     | 1           | (3.57)  |
| Black/African American                                 | 0           | (0)     | 1           | (3.57)  |
| Native Hawaiian/Pacific Islander                       | 0           | (0)     | 1           | (3.57)  |
| Hispanic                                               | 1           | (2.44)  | 7           | (25)    |
| Indigenous                                             | 7           | (17.07) | 1           | (3.57)  |
| Multiracial                                            | 0           | (0)     | 2           | (7.14)  |
| White                                                  | 33          | (80.49) | 15          | (53.57) |
| Diagnosis (%)                                          |             |         |             |         |
| Major depressive disorder (MDD)<br>without comorbidity | 20          | (48.78) |             |         |
| MDD and anxiety disorder                               | 21          | (51.22) |             |         |

|                              |       |         |       |        |
|------------------------------|-------|---------|-------|--------|
| Generalized anxiety disorder | 13    | (31.71) |       |        |
| Social anxiety disorder      | 7     | (17.07) |       |        |
| Panic disorder               | 10    | (24.39) |       |        |
| Depressive episode (%)       |       |         |       |        |
| Single episode               | 14    | (34.15) |       |        |
| Recurrent                    | 27    | (65.85) |       |        |
| Medicated (%)                | 21    | (51.22) |       |        |
| Antidepressants              | 18    | (43.9)  |       |        |
| Stimulants                   | 5     | (12.2)  |       |        |
| Sedatives                    | 7     | (17.07) |       |        |
| Current psychotherapy (%)    | 9     | (21.95) |       |        |
| <hr/>                        |       |         |       |        |
| Clinical measures            |       |         |       |        |
| RRS Brooding                 | 12.61 | (3.13)  | 6.46  | (1.53) |
| RRS Depressive rumination    | 30.76 | (6.76)  | 15.36 | (3.96) |
| RRS Reflection               | 11.07 | (3.34)  | 6.79  | (3.13) |
| RRS Total                    | 54.44 | (11.60) | 28.61 | (7.28) |
| State-RNT (VAS) - Rest       | 2.59  | (2.23)  | 2.03  | (1.28) |
| State-RNT (VAS) - Induction  | 7.08  | (1.66)  | 5.61  | (1.81) |
| MADRS                        | 19.9  | (5.86)  |       |        |
| HAMA                         | 16.15 | (5.22)  |       |        |

219

## 220 **3.2 Insular-to-whole brain FC patters**

### 221 **Interaction effect of diagnosis-by-run**

222 We first examined the interaction effect of diagnosis (MDD vs HC) by run (resting-state  
223 vs RNT-induction). Contrary to our hypothesis, no significant FC alterations were  
224 observed for the diagnosis-by-run interaction across any of the insular subregions.

225 Results with a threshold of  $p < 0.001$ , without cluster thresholding, are presented in the

226 **Supplementary Materials, Figures S2 and S3.**

227

### 228 **Main effect of diagnosis and run**

229 Participants with MDD demonstrated greater FC between the bilateral anterior, middle,  
230 and posterior insular regions and the cerebellum ( $z = 4.31-6.15$ ). These results suggest  
231 a unique pattern of insular-cerebellar connectivity in MDD (**Table 2**, and

232 **Supplementary Figures S4 and S5**).

**Table 2.** Significant regions showing main effect of diagnosis (MDD and HC) from seed-to-whole brain functional connectivity analysis.

| Brain regions                          | MNI coordinate |     |     | Voxels<br>(2mm <sup>3</sup> ) | Chi-square | z-score<br>(MDD -<br>HC) |
|----------------------------------------|----------------|-----|-----|-------------------------------|------------|--------------------------|
|                                        | x              | y   | z   |                               |            |                          |
| <b>Left insula subregions as seeds</b> |                |     |     |                               |            |                          |
| <b>1. G-seed</b>                       |                |     |     |                               |            |                          |
| Right Cerebellum (Crus 2, VIII)        | 17             | -71 | -41 | 416                           | 28.83      | 5.61                     |
| <b>2. vla-seed</b>                     |                |     |     |                               |            |                          |
| Left Visual Area                       | -13            | -93 | 13  | 290                           | 20.41      | 4.46                     |
| Right Visual Area                      | 23             | -89 | 9   | 223                           | 27.40      | 5.13                     |
| Right Visual Area                      | 31             | -69 | -19 | 198                           | 25.97      | 5.22                     |
| <b>3. dla-seed</b>                     |                |     |     |                               |            |                          |
| Right Visual Area                      | 19             | -81 | -39 | 568                           | 25.08      | 5.01                     |
| Right Visual Area                      | 19             | -87 | 21  | 379                           | 26.25      | 5.30                     |
| Left Visual Area                       | -23            | -77 | -17 | 327                           | 27.48      | 5.42                     |

|                                                       |     |     |     |      |       |      |
|-------------------------------------------------------|-----|-----|-----|------|-------|------|
| Left Visual Area                                      | -25 | -91 | 17  | 320  | 22.78 | 4.78 |
| Right Cerebellum (Crus 1, VI, VIII)                   | 37  | -45 | -37 | 197  | 28.72 | 5.58 |
| Bilateral Visual Area                                 | 5   | -83 | 45  | 192  | 25.99 | 5.20 |
| Left Ventral Caudate                                  | -21 | 27  | -7  | 179  | 31.26 | 5.91 |
| Right Lateral Occipital Cortex, Middle Temporal Gyrus | 33  | -69 | 19  | 174  | 23.32 | 4.65 |
| Bilateral Visual Area                                 | 7   | -53 | 1   | 165  | 24.70 | 5.05 |
| Left Cerebellum (Crus 2)                              | -15 | -87 | -39 | 151  | 21.15 | 4.54 |
| <b>4. vld/vlg-seed</b>                                |     |     |     |      |       |      |
| Right Cerebellum (Crus 2, VIII)                       | 13  | -71 | -41 | 304  | 22.11 | 4.70 |
| Left Cerebellum (Crus 2)                              | -21 | -79 | -39 | 154  | 25.03 | 5.10 |
| <b>5. dld-seed</b>                                    |     |     |     |      |       |      |
| Bilateral Visual Area                                 | -1  | -77 | -3  | 305  | 25.03 | 5.09 |
| Right Cerebellum (Crus 2, Crus 1, VIII)               | 23  | -77 | -39 | 284  | 26.50 | 5.31 |
| Right Cerebellum (VIII, VI)                           | 29  | -43 | -39 | 179  | 25.37 | 5.14 |
| Left Ventral Caudate                                  | -11 | 31  | -3  | 165  | 20.96 | 4.52 |
| Left Visual Area                                      | -33 | -81 | -21 | 159  | 20.69 | 4.49 |
| <b>6. dlq-seed</b>                                    |     |     |     |      |       |      |
| Right Visual Area                                     | 19  | -71 | -41 | 1384 | 33.36 | 6.15 |
| <b>Right insula subregions as seeds</b>               |     |     |     |      |       |      |
| <b>1. G-seed</b>                                      |     |     |     |      |       |      |
| Left Cerebellum (Crus 2, VII)                         | -11 | -79 | -39 | 145  | 23.91 | 4.93 |
| <b>2. vla-seed</b>                                    |     |     |     |      |       |      |
| N/A                                                   |     |     |     |      |       |      |
| <b>3. dla-seed</b>                                    |     |     |     |      |       |      |
| Bilateral Visual Area                                 | 5   | -83 | 43  | 438  | 27.35 | 5.4  |
| Left Visual Area                                      | -23 | -77 | -17 | 349  | 26.65 | 5.3  |
| Right Visual Area                                     | 27  | -69 | 1   | 229  | 23.74 | 4.92 |
| Right Cerebellum (Crus 2, VIII)                       | 21  | -75 | -39 | 186  | 19.49 | 4.31 |
| Left Cerebellum (Crus 2, Crus 1)                      | -21 | -85 | -41 | 167  | 25.74 | 5.16 |
| <b>4. vld/vlg-seed</b>                                |     |     |     |      |       |      |
| Left Visual Area                                      | -25 | -75 | -19 | 217  | 23.94 | 4.94 |
| Bilateral Visual Area                                 | 15  | -77 | -13 | 145  | 23.39 | 4.88 |
| <b>5. dld-seed</b>                                    |     |     |     |      |       |      |
| Bilateral Visual Area                                 | 3   | -79 | -5  | 320  | 22.71 | 4.78 |
| Right Cerebellum (VIII, Crus 2, IX, Crus 1)           | 19  | -73 | -41 | 216  | 28.28 | 5.52 |



|                                                 |     |     |     |     |       |      |
|-------------------------------------------------|-----|-----|-----|-----|-------|------|
| Bilateral Visual Area                           | 1   | -65 | 9   | 166 | 21.37 | 4.58 |
| <b>6. dlq-seed</b>                              |     |     |     |     |       |      |
| Right Cerebellum (Crus 2, Crus 1, Vermis, VIII) | 5   | -77 | -29 | 451 | 25.91 | 5.21 |
| Left Inferior Frontal Gyrus                     | -33 | 7   | 23  | 163 | 23.69 | 4.92 |

---

233 Regarding the main effect of run (**Table 3**, and **Supplementary Figures S6 and S7**),  
 234 enhanced FC was found between the bilateral anterior and middle insula and other key  
 235 brain regions, including the bilateral prefrontal cortices, parietal lobes, posterior  
 236 cingulate cortex, and medial temporal gyrus, encompassing the STS ( $z = 4.47\text{--}8.31$ ).  
 237 **Figure 1** displays additional spider charts and bar plots to illustrate the post-hoc effects  
 238 of these main findings.

**Table 3.** Significant regions showing main effect of run (RNT-induction and Rest) from seed-to-whole brain functional connectivity analysis.

| Brain regions                                         | MNI coordinate |     |     | Voxels<br>(2mm <sup>3</sup> ) | Chi-square | z-score<br>(RNT - Rest) |
|-------------------------------------------------------|----------------|-----|-----|-------------------------------|------------|-------------------------|
|                                                       | x              | y   | z   |                               |            |                         |
| <b>Left insula subregions as seeds</b>                |                |     |     |                               |            |                         |
| <b>1. G-seed</b>                                      |                |     |     |                               |            |                         |
| N/A                                                   |                |     |     |                               |            |                         |
| <b>2. vla-seed</b>                                    |                |     |     |                               |            |                         |
| Right Middle Orbital Gyrus, Inferior Frontal Gyrus    | 35             | 45  | -11 | 525                           | 48.47      | 8.14                    |
| Left Inferior Parietal Lobule                         | -35            | -63 | 51  | 435                           | 25.27      | 5.1                     |
| Left Middle Temporal Gyrus                            | -57            | -59 | -13 | 391                           | 32.44      | 6.05                    |
| Right Middle Temporal Gyrus                           | 59             | -43 | -13 | 348                           | 28.66      | 5.57                    |
| Left Precentral Gyrus, Inferior Frontal Gyrus         | -45            | 9   | 35  | 213                           | 20.83      | 4.5                     |
| Right Angular Gyrus, Inferior Parietal Lobule         | 37             | -63 | 39  | 198                           | 26.91      | 5.33                    |
| Right Inferior Frontal Gyrus                          | 55             | 17  | 25  | 197                           | 20.64      | 4.48                    |
| Left Middle Orbital Gyrus, Inferior Frontal Gyrus     | -43            | 47  | -13 | 164                           | 26.44      | 5.27                    |
| <b>3. dla-seed</b>                                    |                |     |     |                               |            |                         |
| Posterior Cingulate Cortex                            | 5              | -39 | 31  | 2527                          | 38.62      | 6.82                    |
| Left Angular Gyrus, Superior Parietal Lobule          | -41            | -69 | 53  | 664                           | 32.59      | 6.06                    |
| Right Middle Temporal Gyrus, Superior Temporal Sulcus | 63             | -33 | -9  | 562                           | 32.75      | 6.09                    |
| Left Middle Temporal Gyrus, Superior Temporal Sulcus  | -65            | -43 | -7  | 548                           | 30.90      | 5.87                    |
| Right Angular Gyrus, Superior Parietal Lobule         | 37             | -65 | 43  | 469                           | 28.81      | 5.61                    |

#### 4. vld/vlg-seed

|                                                      |     |     |     |     |       |       |
|------------------------------------------------------|-----|-----|-----|-----|-------|-------|
| Left Angular Gyrus, Superior Parietal Lobule         | 37  | -71 | 53  | 658 | 32.59 | 6.03  |
| Left Inferior Temporal Gyrus, Middle Temporal Gyrus  | -59 | -61 | -11 | 312 | 37.17 | 6.66  |
| Right Inferior Temporal Gyrus, Middle Temporal Gyrus | 63  | -41 | -9  | 302 | 37.02 | 6.61  |
| Bilateral Supplementary Motor Area                   | 3   | 11  | 67  | 236 | 24.08 | -4.95 |
| Left Caudate, Putamen                                | -17 | 13  | 7   | 181 | 25.57 | -5.15 |
| Right Middle Orbital Gyrus, Inferior Frontal Gyrus   | 45  | 47  | -19 | 178 | 22.21 | 4.70  |

#### 5. dld-seed

|                                                       |     |     |    |     |       |       |
|-------------------------------------------------------|-----|-----|----|-----|-------|-------|
| Posterior Cingulate Cortex                            | -1  | -33 | 41 | 771 | 30.35 | 5.80  |
| Right Middle Temporal Gyrus, Superior Temporal Sulcus | 65  | -37 | -9 | 513 | 30.80 | 5.84  |
| Left Angular Gyrus, Inferior Parietal Lobule,         | -33 | -73 | 41 | 487 | 32.04 | 6.01  |
| Right Angular Gyrus, Inferior Parietal Lobule         | 37  | -71 | 53 | 465 | 33.71 | 6.2   |
| Right Supplementary Motor Area                        | 3   | 11  | 59 | 364 | 29.89 | -5.74 |
| Left Middle Temporal Gyrus, Superior Temporal Sulcus  | -65 | -45 | -7 | 356 | 33.91 | 6.23  |

#### 6. dlg-seed

N/A

---

#### Right insula subregions as seeds

---

#### 1. G-seed

N/A

#### 2. vla-seed

N/A

#### 3. dla-seed

|                                                       |     |     |    |      |       |      |
|-------------------------------------------------------|-----|-----|----|------|-------|------|
| Posterior Cingulate Cortex                            | -1  | -33 | 39 | 2925 | 49.76 | 8.31 |
| Left Angular Gyrus, Inferior Parietal Lobule          | -41 | -69 | 53 | 1477 | 36.23 | 6.66 |
| Left Middle Temporal Gyrus, Superior Temporal Sulcus  | -67 | -43 | -5 | 765  | 30.22 | 5.77 |
| Right Middle Temporal Gyrus, Superior Temporal Sulcus | 65  | -37 | -7 | 703  | 38.42 | 6.83 |
| Right Angular Gyrus, Inferior Parietal Lobule         | 39  | -65 | 45 | 430  | 26.90 | 5.36 |
| Left Middle Frontal Gyrus                             | -25 | 31  | 47 | 362  | 25.91 | 5.21 |

|                                                                                |     |     |     |      |       |       |
|--------------------------------------------------------------------------------|-----|-----|-----|------|-------|-------|
| Bilateral Supplementary Motor Area                                             | 1   | 9   | 61  | 254  | 25.95 | -5.2  |
| Right Supra Marginal Gyrus                                                     | 65  | -21 | 43  | 246  | 24.15 | -4.97 |
| Right Middle Orbital Gyrus, Inferior Frontal Gyrus                             | 39  | 43  | -13 | 179  | 20.64 | 4.47  |
| Left Middle Orbital Gyrus, Inferior Frontal Gyrus                              | -37 | 43  | -7  | 175  | 25.84 | 5.19  |
| Right Superior Parietal Lobule                                                 | 19  | -57 | 57  | 151  | 20.62 | -4.47 |
| <b>4. vld/vlg-seed</b>                                                         |     |     |     |      |       |       |
| Right Middle Temporal Gyrus, Inferior Temporal Gyrus                           | 59  | -43 | -9  | 144  | 25.53 | 5.13  |
| <b>5. dld-seed</b>                                                             |     |     |     |      |       |       |
| Posterior Cingulate Cortex                                                     | -3  | -33 | 41  | 1220 | 38.86 | 6.89  |
| Right Supplementary Motor Area                                                 | 15  | 9   | 55  | 417  | 34.55 | -6.33 |
| Left Angular Gyrus, Inferior Parietal Lobule                                   | -35 | -65 | 33  | 368  | 27.07 | 5.36  |
| Right Inferior Frontal Gyrus, Rolandic Operculum                               | 43  | 9   | 3   | 272  | 26.27 | -5.25 |
| Right Middle Temporal Gyrus, Superior Temporal Sulcus, Inferior Temporal Gyrus | 65  | -17 | -21 | 244  | 30.21 | 5.79  |
| Left Middle Temporal Gyrus, Superior Temporal Sulcus, Inferior Temporal Gyrus  | -65 | -45 | -7  | 223  | 27.50 | 5.41  |
| Right Angular Gyrus, Superior Parietal Lobule                                  | 37  | -67 | 45  | 165  | 22.98 | 4.8   |
| <b>6. dlg-seed</b>                                                             |     |     |     |      |       |       |
| N/A                                                                            |     |     |     |      |       |       |

239 [Insert Figure 1]

240

### 241 3.3 Correlation between insular FC and RNT measures

242 **Figure 2** depicts significant associations between RNT measures and FC of the insular  
 243 cortex with other regions in MDD participants, as well as HC participants. Consistent  
 244 with our findings in increased insular FC during RNT-induction relative to the resting-

245 state, among individuals with MDD, higher trait-RNT was positively associated with  
246 increased FC between the right dorsal anterior and middle insula, regions in the DMN  
247 (including the posterior cingulate cortex and middle temporal gyrus), and regions in the  
248 salience network (SN) (including the orbital frontal gyrus). Moreover, greater state-RNT  
249 scores during RNT-induction, compared to resting-state, were positively correlated with  
250 increased FC in similar insular regions and the bilateral angular gyrus, as well as the  
251 right middle temporal gyrus (**Figure 2**). On the other hand, higher trait-RNT was  
252 negatively correlated with increased insular FC between the left anterior insula and the  
253 inferior parietal lobule in individuals with MDD, although this FC showed an increased  
254 main effect of RNT-induction (**Table 3 and Figure 1**).

255 [Insert Figure 2]

256

#### 257 **4. Discussion**

258 This study investigated the hypothesis that individuals with MDD would demonstrate a  
259 greater increase in FC between the insular cortex and other cortical (including  
260 cerebellar) regions during RNT-induction compared to resting-state. We also predicted  
261 that functional changes would be more pronounced in MDD, as compared with HC  
262 individuals. We observed three main findings during our research by which our  
263 hypothesis was partially supported. First, contrary to our hypothesis, there was no  
264 statistically significant diagnosis-by-run interaction in insular FC, indicating that changes  
265 in FC during RNT-induction are not significantly different in individuals with MDD  
266 compared to HC individuals. Second, FC between insular and cerebellar cortices was  
267 higher in individuals with MDD compared to the HC group. Third, overall, FC between

268 insular and other cortical regions increased during RNT-induction compared to resting-  
269 state data.

270 Altogether, these findings support the hypothesis that the visceral control and  
271 higher-order cognitive processing changes underlie RNT intensity (Tsuchiyagaito *et al.*,  
272 2022). These findings also reflect that insular-cortical FC was stronger during RNT-  
273 induction compared to resting-state. However, our results did not demonstrate a  
274 significant difference in FC alterations during RNT-induction between the MDD and HC  
275 participants.

276

#### 277 **4.1 Insular Connectivity in MDD**

278 The observed higher level in FC between the anterior, middle, and posterior insula and  
279 the cerebellum in MDD participants, as compared to healthy controls, aligns with  
280 emerging literature that emphasizes the critical role of insular alterations in emotional  
281 regulation and the pathophysiology of depression (Habas, 2021, Misaki *et al.*, 2023,  
282 Pierce *et al.*, 2023, Sliz and Hayley, 2012). Moreover, these increased connections  
283 between the insula and the cerebellum indicate that the cerebellum has a significant  
284 role in depression. The increased FC between the insula and the cerebellum that was  
285 observed in our research broadens our understanding of how these brain structures  
286 function independently, as well as with one another, to conceptualize and regulate  
287 emotions.

288 The insula, known for integrating somatosensory, affective, and cognitive  
289 information (Sliz and Hayley, 2012), may be crucial in maintaining the heightened state  
290 of the negative self-focus aspect of RNT. Prior neuroimaging research has associated

291 emotional recalling/remembrance and other cognitively demanding, emotional tasks  
292 with increased insular activity (Phan *et al.*, 2002). In this context, our observation of  
293 increased FC between the insula and other brain regions during RNT-induction tasks is  
294 not surprising. Furthermore, this suggests that the trained-regulation of insular activity,  
295 or decreasing FC between the bilateral insula and other areas such as the STS, the  
296 parietal cortices, or the posterior cingulate cortex (PCC), may reduce state-RNT  
297 symptoms. For example, the emergence of focused deep brain neuromodulation or real-  
298 time fMRI neurofeedback in FC literature prompt deeper exploration of these brain  
299 activity regulation methods as a means to improve RNT in depression.

300 The cerebellum's role in cognitive and emotional processing, traditionally  
301 recognized in the last two decades (Pierce *et al.*, 2023, Rudolph *et al.*, 2023), appears  
302 to be particularly significant in the context of mood disorders. Previous resting-state  
303 static and dynamic FC research identifies the cerebellum as having a vital role in  
304 emotional processing and executive functioning through its connections to the executive  
305 network (EN), the DMN, the salience network (SN), the insula, and multiple brain  
306 cortical hubs associated with emotion regulation (Habas, 2021). These connections  
307 suggest that the cerebellum is involved in frequent, multimodal collaboration with other  
308 crucial brain regions and networks to undertake the multifaceted nature of human  
309 emotions. Considering the cerebellum's association with emotion regulation and other  
310 key networks, the cerebellum may also be an ROI worth investigating in future FC  
311 studies involving clinically depressed populations.

312

## 313 **4.2 Alterations During RNT Induction**

314 The augmentation of FC during RNT-induction between insular regions and areas, such  
315 as the prefrontal and parietal cortices, posterior cingulate cortex, medial temporal gyrus,  
316 and the STS, is particularly noteworthy. These regions are implicated in a wide range of  
317 processes, from self-referential thought to emotional processing and memory retrieval.  
318 The increased connectivity that was noticed during RNT-induction in our work suggests  
319 a heightened state of neural coordination in these networks, potentially underpinning the  
320 ruminative process.

321 Foregoing studies have presented similar results, demonstrating significant  
322 transformations in FC that occur in state-RNT. In another mood-induction study,  
323 researchers found that increased connectivity between the DMN and the fronto-parietal  
324 network (FPN), along with decreased connectivity between the SN and the FPN, are  
325 both associated with increased RNT after experiencing sadness (Lydon-Staley *et al.*,  
326 2019). The changes in RNT-induced FC that were observed during our research,  
327 particularly with the MDD sample population, were congruent to the findings of their  
328 research. In these types of RNT-induction studies, a variety of key networks and brain  
329 regions can be observed at play in emotion regulation, many of which may serve as  
330 potential targets for interventions and future research aimed at reducing trait- and/or  
331 state- RNT symptoms.

332

### 333 **4.3 Correlation between insular FC and trait- and state-RNT scores**

334 The correlation of both trait- and state-RNT scores with increased FC in specific brain  
335 regions, particularly in MDD patients as reported herein, suggests that FC could be a  
336 potential biomarker for RNT severity in clinical settings. Specifically, trait-RNT scores



337 were associated with the increased insular FC of several key regions in the DMN and  
338 orbitofrontal gyrus, which are implicated in self-referential and emotional processing  
339 (Northoff *et al.*, 2006, REMPEL-CLOWER, 2007). This association highlights the neural  
340 correlates of a general propensity to engage in RNT, reflecting a stable, trait-like aspect  
341 of cognitive processing in individuals. In contrast, state-RNT scores were associated  
342 with FC between the insula and the angular gyrus, as well as the right medial temporal  
343 gyrus, during experimentally induced RNT. Changes in state-RNT ratings indicate how  
344 participants engaged with RNT during the experimental induction relative to the resting-  
345 state. The association with increased FC in these regions suggests that the acute  
346 induction of RNT may engage neural circuits related to memory, conceptual processing  
347 (Deen *et al.*, 2015, Humphreys *et al.*, 2021, Ramanan *et al.*, 2018, Seghier, 2013), and  
348 the integration of emotional and sensory information (Craig, 2009). This distinction  
349 underlines the dynamic nature of RNT, where state-dependent increases in RNT were  
350 correlated with immediate neural responses, differentiating it from the more static trait-  
351 RNT. Such findings illustrate the complex neural underpinnings of RNT, supporting the  
352 idea that different facets of RNT are potentially supported by different neural networks,  
353 as reported in prior studies (Rosenbaum *et al.*, 2017, Tsuchiyagaito *et al.*, 2023a).  
354 However, we would caution against any definitive conclusions based on correlation  
355 analysis due to the exploratory nature of this analysis.

356

## 357 **5. Limitations and Future Directions**

358 While our findings contribute significantly to the understanding of RNT in MDD, several  
359 limitations, such as the small sample size, must be acknowledged. Longitudinal studies,

360 or interventional studies using emerging neuromodulation methods to noninvasively  
361 modulate the large-scale circuits described herein (Philip and Arulpragasam, 2023),  
362 could help to establish a causative role of neural alterations in RNT.

363 Moreover, preceding research by our group and others has suggested that RNT is a  
364 transdiagnostic occurrence, as it is a usual feature in individuals with generalized  
365 anxiety disorder (GAD) and obsessive-compulsive disorder (OCD) (Wahl *et al.*, 2019).  
366 Given the comorbidity of these disorders, it may be worth conducting a similar  
367 investigation that explores FC developments and trait-/state-RNT with participants from  
368 GAD and OCD populations.

369

## 370 **6. Conclusion**

371 The findings of our study underscore the importance of insular connectivity in the neural  
372 systems underlying RNT in MDD. Individuals with MDD exhibit distinct functional  
373 connectivity patterns between the insula and the cerebellum, highlighting a neural circuit  
374 that may contribute to the persistence and intensity of RNT. In addition, both MDD and  
375 healthy control participants show increased insular connectivity with key brain regions,  
376 including the bilateral prefrontal cortices, parietal lobes, posterior cingulate cortex, and  
377 medial temporal gyrus, during RNT-induction compared to resting-state. This suggests  
378 that the insula is part of a broader network that becomes more engaged during active  
379 RNT, facilitating the integration of emotional and cognitive aspects of negative self-  
380 related thoughts. Moreover, higher trait-RNT in MDD participants was associated with  
381 increased connectivity between the insula and regions within the DMN and SN,  
382 indicating that persistent negative thinking is linked to specific insular connectivity

383 patterns involving self-referential processing and emotional salience. These differential  
384 connectivity patterns, including regions where higher trait-RNT is negatively correlated  
385 with increased insular connectivity, may serve as neural markers for the intensity of RNT.

386 Taken together, our findings highlight the critical role of insular connectivity and its  
387 interactions with other brain regions in the manifestation of RNT in MDD, providing a  
388 foundation for the development of targeted neuromodulatory interventions to alleviate  
389 this symptom in depression. This is in line with emerging neuromodulation techniques  
390 with anatomical specificity (Mehić *et al.*, 2014, Siddiqi *et al.*, 2020) that can be used to  
391 modulate this circuitry.

392

393

#### 394 **Author Contributions**

395 Conceptualization: Landon S Edwards and Aki Tsuchiyagaito; methodology and  
396 formal analysis: Landon S Edwards, Masaya Misaki, Aki Tsuchiyagaito; writing – original  
397 draft: : Landon S Edwards, Salvador M Guinjoan, and Aki Tsuchiyagaito; writing –  
398 review and editing: Saampras Ganesan, Jolene Tay, Eli S Elliott, Masaya Misaki, Martin  
399 P Paulus, Salvador M Guinjoan, Evan J White; resources: Masaya Misaki and Martin P.  
400 Paulus; supervision: Martin P. Paulus, and Salvador M. Guinjoan; funding acquisition:  
401 Martin P. Paulus.

402

#### 403 **Role of the Funding Sources**

404 This work has been supported in part by the National Institute of General Medical  
405 Sciences Center Grant Award Number, P20GM121312 and the Laureate Institute for

406 Brain Research. The content is solely the responsibility of the authors and does not  
407 necessarily represent the official views of the National Institutes of Health.

408

### 409 **Acknowledgments**

410 We would like to express our appreciation to CoBRE NeuroMap Investigators at  
411 LIBR and all the research participants. We acknowledge the contributions of Sahib S.  
412 Khalsa, M.D., Ph.D., Tim Collins, Dara Crittenden, Amy Peterson, Megan Cole, Lisa  
413 Kinyon, Lindsey Bailey, Courtney Boone, Natosha Markham, Lisa Rillo, Angela Yakshin,  
414 and the LIBR Assessment Team for diagnostic assessments and data collection, and  
415 Julie Arterbury, Leslie Walker, Amy Ginn, Bill Alden, Julie DiCarlo, and Greg Hammond  
416 for helping with MRI scanning. The authors acknowledge Jerzy Bodurka, Ph.D. (1964–  
417 2021) for his intellectual and scientific contributions to the establishment of the EEG,  
418 structural and functional MRI, and neurofeedback processes that provided the  
419 foundation for the data collection, analysis, and interpretation of findings for the present  
420 work.

421

### 422 **Conflict of Interest Disclosure**

423 Dr. Martin P. Paulus is an advisor to Spring Care, Inc., a behavioral health startup,  
424 and he has received royalties for an article about methamphetamine in UpToDate. Dr.  
425 Martin P. Paulus has a consulting agreement with and receives compensation from F.  
426 Hoffmann-La Roche Ltd. The other authors report no financial relationships with  
427 commercial interests related to the present study.

428

## 429 References

- 430 **Avants, B. B., Epstein, C. L., Grossman, M. & Gee, J. C.** (2008). Symmetric  
431 diffeomorphic image registration with cross-correlation: evaluating automated labeling of  
432 elderly and neurodegenerative brain. *Med Image Anal* **12**, 26-41.
- 433 **Birn, R. M., Smith, M. A., Jones, T. B. & Bandettini, P. A.** (2008). The respiration  
434 response function: the temporal dynamics of fMRI signal fluctuations related to changes  
435 in respiration. *Neuroimage* **40**, 644-654.
- 436 **Chang, F., Berenz, E. C., Ajilore, O., Langenecker, S. A., Burgess, H. J., Phan, K. L.  
437 & Klumpp, H.** (2023). Actigraphic Wake after Sleep Onset and Symptom Severity  
438 Correspond with Rumination in Trauma-Exposed Individuals. *Brain Sci* **13**.
- 439 **Craig, A. D.** (2009). How do you feel--now? The anterior insula and human awareness.  
440 *Nat Rev Neurosci* **10**, 59-70.
- 441 **Deen, B., Koldewyn, K., Kanwisher, N. & Saxe, R.** (2015). Functional Organization of  
442 Social Perception and Cognition in the Superior Temporal Sulcus. *Cereb Cortex* **25**,  
443 4596-609.
- 444 **Fan, L., Li, H., Zhuo, J., Zhang, Y., Wang, J., Chen, L., Yang, Z., Chu, C., Xie, S.,  
445 Laird, A. R., Fox, P. T., Eickhoff, S. B., Yu, C. & Jiang, T.** (2016). The Human  
446 Brainnetome Atlas: A New Brain Atlas Based on Connectional Architecture. *Cereb  
447 Cortex* **26**, 3508-26.
- 448 **Glover, G. H., Li, T. Q. & Ress, D.** (2000). Image-based method for retrospective  
449 correction of physiological motion effects in fMRI: RETROICOR. *Magn Reson Med* **44**,  
450 162-7.
- 451 **Goldstein-Piekarski, A. N., Ball, T. M., Samara, Z., Staveland, B. R., Keller, A. S.,  
452 Fleming, S. L., Grisanzio, K. A., Holt-Gosselin, B., Stetz, P. & Ma, J.** (2022). Mapping  
453 neural circuit biotypes to symptoms and behavioral dimensions of depression and  
454 anxiety. *Biological Psychiatry* **91**, 561-571.
- 455 **Grant, D. M., Mills, A. C., Judah, M. R. & White, E. J.** (2021). State and trait effects of  
456 rumination on inhibitory processes in memory: Rumination and retrieval inhibition  
457 processes. *Current Psychology* **40**, 4875-4883.
- 458 **Habas, C.** (2021). Functional Connectivity of the Cognitive Cerebellum. *Frontiers in  
459 Systems Neuroscience* **15**.
- 460 **Humphreys, G. F., Ralph, M. A. L. & Simons, J. S.** (2021). A unifying account of  
461 angular gyrus contributions to episodic and semantic cognition. *Trends in  
462 Neurosciences* **44**, 452-463.
- 463 **Jacob, Y., Morris, L. S., Huang, K. H., Schneider, M., Rutter, S., Verma, G.,  
464 Murrrough, J. W. & Balchandani, P.** (2020). Neural correlates of rumination in major  
465 depressive disorder: A brain network analysis. *Neuroimage Clin* **25**, 102142.
- 466 **Jo, H. J., Saad, Z. S., Simmons, W. K., Milbury, L. A. & Cox, R. W.** (2010). Mapping  
467 sources of correlation in resting state FMRI, with artifact detection and removal.  
468 *Neuroimage* **52**, 571-82.
- 469 **Krajniak, M., Miranda, R. & Wheeler, A.** (2013). Rumination and pessimistic certainty  
470 as mediators of the relation between lifetime suicide attempt history and future suicidal  
471 ideation. *Arch Suicide Res* **17**, 196-211.

- 472 **LeMoult, J., Arditte, K. A., D'Avanzato, C. & Joormann, J.** (2013). State Rumination:  
473 Associations with Emotional Stress Reactivity and Attention Biases. *J Exp Psychopathol*  
474 **4**, 471-484.
- 475 **Lydon-Staley, D. M., Kuehner, C., Zamoscik, V., Huffziger, S., Kirsch, P. & Bassett,**  
476 **D. S.** (2019). Repetitive negative thinking in daily life and functional connectivity among  
477 default mode, fronto-parietal, and salience networks. *Translational Psychiatry* **9**, 234.
- 478 **Maier, W., Buller, R., Philipp, M. & Heuser, I.** (1988). The Hamilton Anxiety Scale:  
479 reliability, validity and sensitivity to change in anxiety and depressive disorders. *J Affect*  
480 *Disord* **14**, 61-8.
- 481 **Makovac, E., Fagioli, S., Rae, C. L., Critchley, H. D. & Ottaviani, C.** (2020). Can't get  
482 it off my brain: Meta-analysis of neuroimaging studies on perseverative cognition.  
483 *Psychiatry Research: Neuroimaging* **295**, 111020.
- 484 **Mehić, E., Xu, J. M., Caler, C. J., Coulson, N. K., Moritz, C. T. & Mourad, P. D.** (2014).  
485 Increased anatomical specificity of neuromodulation via modulated focused ultrasound.  
486 *PloS one* **9**, e86939.
- 487 **Misaki, M., Tsuchiyagaito, A., Guinjoan, S. M., Rohan, M. L. & Paulus, M. P.** (2023).  
488 Trait repetitive negative thinking in depression is associated with functional connectivity  
489 in negative thinking state rather than resting state. *J Affect Disord* **340**, 843-854.
- 490 **Montgomery, S. A. & Asberg, M.** (1979). A new depression scale designed to be  
491 sensitive to change. *Br J Psychiatry* **134**, 382-9.
- 492 **Nolen-Hoeksema, S. & Morrow, J.** (1991). A prospective study of depression and  
493 posttraumatic stress symptoms after a natural disaster: the 1989 Loma Prieta  
494 Earthquake. *J Pers Soc Psychol* **61**, 115-21.
- 495 **Nolen-Hoeksema, S., Wisco, B. E. & Lyubomirsky, S.** (2008). Rethinking Rumination.  
496 *Perspect Psychol Sci* **3**, 400-24.
- 497 **Northoff, G., Heinzl, A., De Greck, M., Bermpohl, F., Dobrowolny, H. & Panksepp,**  
498 **J.** (2006). Self-referential processing in our brain—a meta-analysis of imaging studies  
499 on the self. *Neuroimage* **31**, 440-457.
- 500 **Phan, K. L., Wager, T., Taylor, S. F. & Liberzon, I.** (2002). Functional Neuroanatomy of  
501 Emotion: A Meta-Analysis of Emotion Activation Studies in PET and fMRI. *NeuroImage*  
502 **16**, 331-348.
- 503 **Philip, N. S. & Arulpragasam, A. R.** (2023). Reaching for the unreachable: low  
504 intensity focused ultrasound for non-invasive deep brain stimulation.  
505 *Neuropsychopharmacology* **48**, 251.
- 506 **Philippi, C. L., Leutzinger, K., Pessin, S., Cassani, A., Mikel, O., Walsh, E. C., Hoks,**  
507 **R. M., Birn, R. M. & Abercrombie, H. C.** (2022). Neural signal variability relates to  
508 maladaptive rumination in depression. *J Psychiatr Res* **156**, 570-578.
- 509 **Pierce, J. E., Thomasson, M., Voruz, P., Selosse, G. & Péron, J.** (2023). Explicit and  
510 implicit emotion processing in the cerebellum: a meta-analysis and systematic review.  
511 *The Cerebellum* **22**, 852-864.
- 512 **Posner, K., Brown, G. K., Stanley, B., Brent, D. A., Yershova, K. V., Oquendo, M. A.,**  
513 **Currier, G. W., Melvin, G. A., Greenhill, L., Shen, S. & Mann, J. J.** (2011). The  
514 Columbia-Suicide Severity Rating Scale: initial validity and internal consistency findings  
515 from three multisite studies with adolescents and adults. *Am J Psychiatry* **168**, 1266-77.

- 516 **Ramanan, S., Piguet, O. & Irish, M.** (2018). Rethinking the role of the angular gyrus in  
517 remembering the past and imagining the future: the contextual integration model. *The*  
518 *Neuroscientist* **24**, 342-352.
- 519 **REMPEL-CLOWER, N. L.** (2007). Role of orbitofrontal cortex connections in emotion.  
520 *Annals of the New York Academy of Sciences* **1121**, 72-86.
- 521 **Robinson, M. S. & Alloy, L. B.** (2003). Negative Cognitive Styles and Stress-Reactive  
522 Rumination Interact to Predict Depression: A Prospective Study. *Cognitive Therapy and*  
523 *Research* **27**, 275-291.
- 524 **Rosenbaum, D., Haight, A., Fuhr, K., Haeussinger, F. B., Metzger, F. G., Nuerk, H.-C.,**  
525 **Fallgatter, A. J., Batra, A. & Ehlis, A.-C.** (2017). Aberrant functional connectivity in  
526 depression as an index of state and trait rumination. *Scientific reports* **7**, 2174.
- 527 **Rudolph, S., Badura, A., Lutz, S., Pathak, S. S., Thieme, A., Verpeut, J. L., Wagner,**  
528 **M. J., Yang, Y.-M. & Fioravante, D.** (2023). Cognitive-affective functions of the  
529 cerebellum. *Journal of Neuroscience* **43**, 7554-7564.
- 530 **Seghier, M. L.** (2013). The angular gyrus: multiple functions and multiple subdivisions.  
531 *The Neuroscientist* **19**, 43-61.
- 532 **Sheehan, D. V., Lecrubier, Y., Sheehan, K. H., Amorim, P., Janavs, J., Weiller, E.,**  
533 **Hergueta, T., Baker, R. & Dunbar, G. C.** (1998). The Mini-International  
534 Neuropsychiatric Interview (M.I.N.I.): the development and validation of a structured  
535 diagnostic psychiatric interview for DSM-IV and ICD-10. *J Clin Psychiatry* **59**, 22-33.
- 536 **Siddiqi, S. H., Taylor, S. F., Cooke, D., Pascual-Leone, A., George, M. S. & Fox, M.**  
537 **D.** (2020). Distinct symptom-specific treatment targets for circuit-based neuromodulation.  
538 *American Journal of Psychiatry* **177**, 435-446.
- 539 **Sliz, D. & Hayley, S.** (2012). Major Depressive Disorder and Alterations in Insular  
540 Cortical Activity: A Review of Current Functional Magnetic Imaging Research. *Frontiers*  
541 *in Human Neuroscience* **6**.
- 542 **Surrence, K., Miranda, R., Marroquin, B. M. & Chan, S.** (2009). Brooding and  
543 reflective rumination among suicide attempters: cognitive vulnerability to suicidal  
544 ideation. *Behav Res Ther* **47**, 803-8.
- 545 **Taylor, J. E., Yamada, T., Kawashima, T., Kobayashi, Y., Yoshihara, Y., Miyata, J.,**  
546 **Murai, T., Kawato, M. & Motegi, T.** (2022). Depressive symptoms reduce when  
547 dorsolateral prefrontal cortex-precuneus connectivity normalizes after functional  
548 connectivity neurofeedback. *Scientific reports* **12**, 2581.
- 549 **Tozzi, L., Zhang, X., Chesnut, M., Holt-Gosselin, B., Ramirez, C. A. & Williams, L. M.**  
550 (2021). Reduced functional connectivity of default mode network subsystems in  
551 depression: meta-analytic evidence and relationship with trait rumination. *NeuroImage:*  
552 *Clinical* **30**, 102570.
- 553 **Treynor, W., Gonzalez, R. & Nolen-Hoeksema, S.** (2003). Rumination Reconsidered:  
554 A Psychometric Analysis. *Cognitive Therapy and Research* **27**, 247-259.
- 555 **Tsuchiyagaito, A., Misaki, M., Cochran, G., Philip, N. S., Paulus, M. P. & Guinjoan,**  
556 **S. M.** (2023a). Thalamo-cortical circuits associated with trait-and state-repetitive  
557 negative thinking in major depressive disorder. *Journal of Psychiatric Research* **168**,  
558 184-192.
- 559 **Tsuchiyagaito, A., Misaki, M., Kirlic, N., Yu, X., Sanchez, S. M., Cochran, G.,**  
560 **Stewart, J. L., Smith, R., Fitzgerald, K. D., Rohan, M. L., Paulus, M. P. & Guinjoan,**  
561 **S. M.** (2023b). Real-Time fMRI Functional Connectivity Neurofeedback Reducing

562 Repetitive Negative Thinking in Depression: A Double-Blind, Randomized, Sham-  
563 Controlled Proof-of-Concept Trial. *Psychother Psychosom* **92**, 87-100.  
564 **Tsuchiyagaito, A., Misaki, M., Zoubi, O. A., Tulsa, I., Paulus, M. & Bodurka, J.**  
565 (2021). Prevent breaking bad: A proof of concept study of rebalancing the brain's  
566 rumination circuit with real-time fMRI functional connectivity neurofeedback. *Hum Brain*  
567 *Mapp* **42**, 922-940.  
568 **Tsuchiyagaito, A., Sanchez, S. M., Misaki, M., Kuplicki, R., Park, H., Paulus, M. P. &**  
569 **Guinjoan, S. M.** (2022). Intensity of repetitive negative thinking in depression is  
570 associated with greater functional connectivity between semantic processing and  
571 emotion regulation areas. *Psychol Med*, 1-12.  
572 **Wahl, K., Ehring, T., Kley, H., Lieb, R., Meyer, A., Kordon, A., Heinzl, C. V.,**  
573 **Mazanec, M. & Schönfeld, S.** (2019). Is repetitive negative thinking a transdiagnostic  
574 process? A comparison of key processes of RNT in depression, generalized anxiety  
575 disorder, obsessive-compulsive disorder, and community controls. *Journal of Behavior*  
576 *Therapy and Experimental Psychiatry* **64**, 45-53.  
577 **Wang, C., Song, X., Lee, T. M. C. & Zhang, R.** (2022). Psychometric Properties of the  
578 Chinese Version of the Brief State Rumination Inventory. *Front Public Health* **10**,  
579 824744.  
580 **Watkins, E. R. & Roberts, H.** (2020). Reflecting on rumination: Consequences, causes,  
581 mechanisms and treatment of rumination. *Behav Res Ther* **127**, 103573.  
582



## Figure legends

**Figure 1.** Post-hoc investigation of A) effect of diagnosis (MDD vs. HC) and B) effect of run (RNT-induction vs. Rest). Abbreviations: L - Left, r - Right, Cr - Cerebellum, Vis - Visual Area, Ver – Vermis, IFG - Inferior Frontal Gyrus, OFG - Orbital Frontal Gyrus, Ang - Angular Gyrus, PrCG – Precentral Gyrus, MTG - Middle Temporal Gyrus, IPL - Inferior Parietal Lobule, PCC - Posterior Cingulate Cortex, SMG - Supramarginal Gyrus, SPL - Superior Parietal Lobule, SMA - Supplementary Motor Area, OpIFG - Opercular part of the Inferior Frontal Gyrus.

**Figure 2.** Scatter plots and correlation between insular-cortical functional connectivity (FC) and RNT measures. A) Correlation of trait-RNT as measured by the Ruminative Response Scale-Brooding subscale (RRS-B) before the scan (x-axis) with changes in FC during RNT-induction scan compared to the Rest scan (y-axis). B) Correlation of changes in state-RNT as measured by the Visual Analogue Scale (VAS) during RNT-induction scan compared to the Rest scan (x-axis) with changes in FC during RNT-induction scan compared to Rest scan (y-axis). Abbreviations: L - Left, R - Right, IPL - Inferior Parietal Lobule, MTG - Middle Temporal Gyrus, PCC - Posterior Cingulate Cortex, SMG - Supramarginal Gyrus, Ang - Angular Gyrus, OFG - Orbital Frontal Gyrus, SPL - Superior Parietal Lobule, SMA - Supplementary Motor Area.

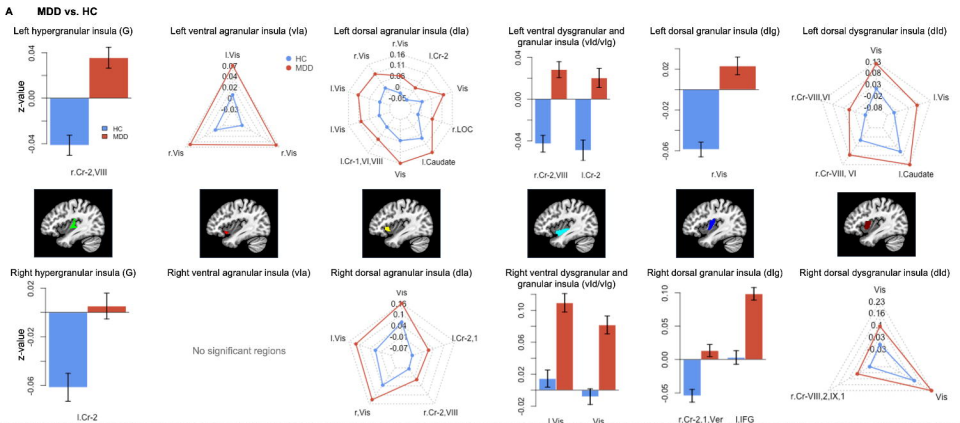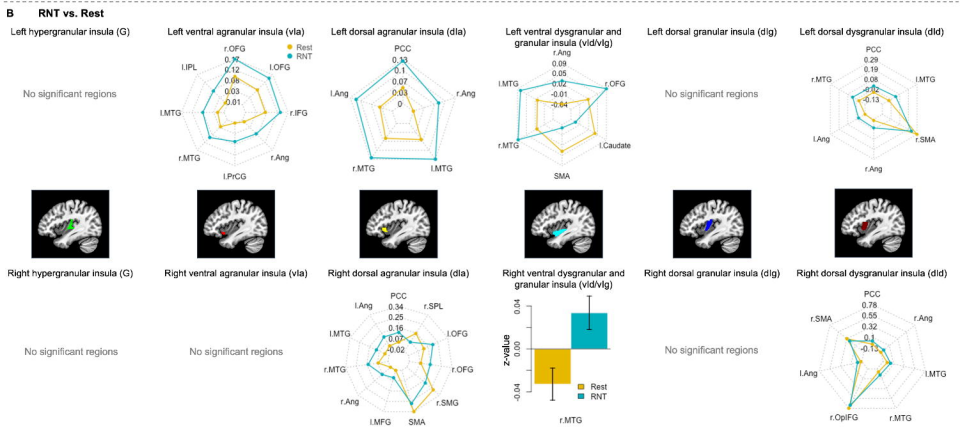

### A Trait-RNT (RRS-B)

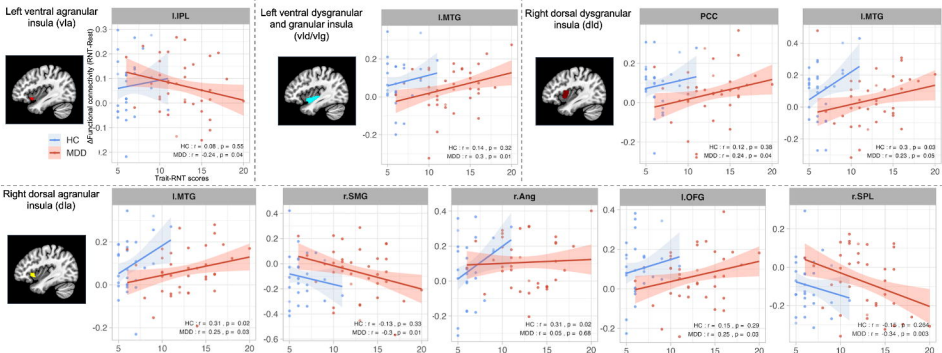

### B State-RNT (VAS)

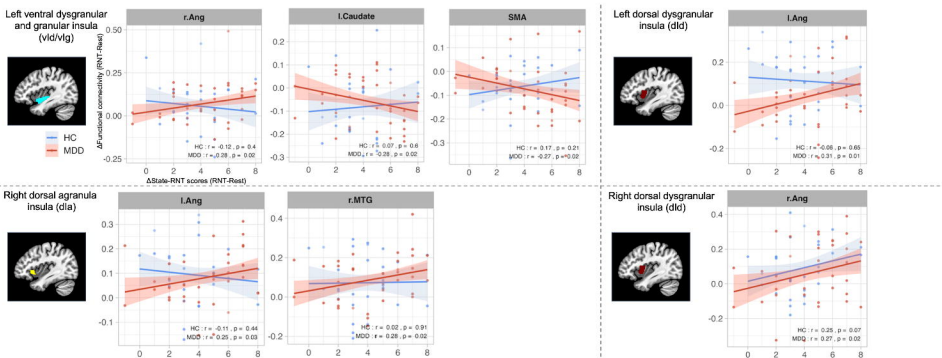

Source: https://medrxiv.org/content/10.1101/2024.10.15.24315550v1.full.pdf
